# Supplementary material for: Role of pre-existing adversity and child maltreatment on mental health outcomes for children involved in child protection: population-based data linkage study
Source: PubMed Central journal article supplement — BMJ Open. 2019 Jul 29;9(7):e029675. doi: 10.1136/bmjopen-2019-029675 (PMC6678009; doi:10.1136/bmjopen-2019-029675), 2019-07-29
Supplement: bmjopen-2019-029675supp001.pdf [file bmjopen-2019-029675supp001.pdf]

**Table S1. Risk of mental health contact or mental health diagnoses by maltreatment type (primary concern at notification)**

| Maltreatment type    | Any Mental health-related event |                           | Mental health diagnoses |                           |
|----------------------|---------------------------------|---------------------------|-------------------------|---------------------------|
|                      | Univariate OR (95% CI)          | Multivariate OR (95% CI)* | Univariate OR (95% CI)  | Multivariate OR (95% CI)* |
| <b>Any Physical</b>  | 6.13 (5.86, 6.40)               | 2.49 (2.34, 2.65)         | 4.56 (4.35, 4.78)       | 2.35 (2.22, 2.50)         |
| <b>Any Sexual</b>    | 5.45 (5.23, 5.69)               | 2.58 (2.44, 2.73)         | 4.32 (4.13, 4.52)       | 2.70 (2.55, 2.85)         |
| <b>Any Emotional</b> | 5.85 (5.46, 6.27)               | 2.04 (1.86, 2.24)         | 3.96 (3.66, 4.27)       | 1.87 (1.70, 2.06)         |
| <b>Any Neglect</b>   | 7.60 (7.27, 7.94)               | 2.36 (2.22, 2.52)         | 4.13 (3.93, 4.35)       | 1.84 (1.71, 1.97)         |

\* Includes adjustment for Aboriginality, gender, SES, parent marital status at birth, maternal age at birth, paternal age at birth, maternal MH contact, maternal substance related contact, paternal MH contact, paternal substance related contact
